# Supplementary material for: Multifunctional polymers with biomimetic compound architectures via nanoporous AAO films for efficient solar energy harvesting in dye-sensitized solar cells
Source: Royal Society of Chemistry journal article supplement (doi:10.1039/c5ra16276a), 2015-01-01
Supplement: c5ra16276a1.pdf [file c5ra16276a1.pdf]

# Multifunctional polymers with biomimetic compound architectures via nanoporous AAO films for efficient solar energy harvesting in dye-sensitized solar cells

Bhaskar Dudem,<sup>‡</sup> Jung Woo Leem,<sup>‡</sup> Joo Ho Lim, Soo Hyun Lee and Jae Su Yu\*

Department of Electronics and Radio Engineering, Kyung Hee University, 1732 Deogyeong-daero, Giheung-gu, Yongin-si 446-701, South Korea.

\*Authors to whom correspondence should be addressed: [jsyu@khu.ac.kr](mailto:jsyu@khu.ac.kr)

<sup>‡</sup>These authors contributed equally to this work

## Supporting Information

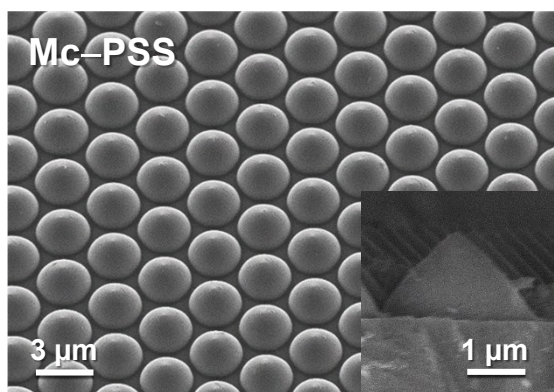

**Fig. S1.** Top- and side-view SEM images of microcone-patterned sapphire substrate (i.e., Mc-PSS).

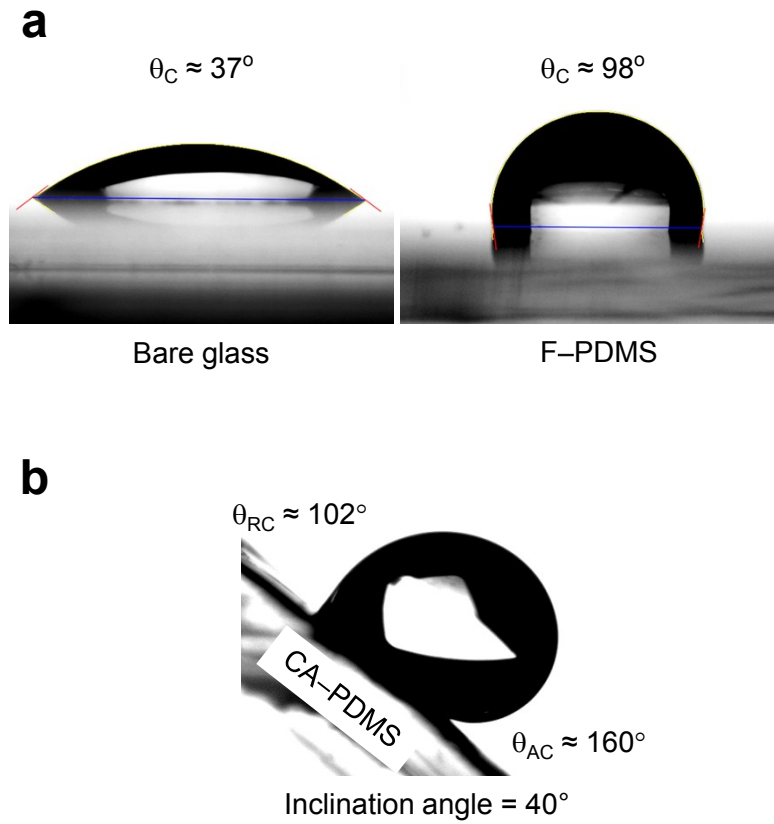

**Fig. S2.** (a) Photographs of a water droplet on the surface of the bare glass and the flat-PDMS (F-PDMS). (b) Photograph of a water droplet on the surface of the CA-PDMS at the inclination angle of  $40^\circ$  ( $\theta_{AC}$  and  $\theta_{RC}$  are the advancing and receding water contact angles, respectively).
